# Supplementary material for: Evaluation of regression methods when immunological measurements are constrained by detection limits
Source: PubMed Central journal article supplement (PMC2592244; doi:10.1186/1471-2172-9-59), 2008-10-17
Supplement: 1471-2172-9-59-S1.pdf [file 1471-2172-9-59-S1.pdf]

| % NDs           | Methods  | Sample size of 200 |       |                       | Sample size of 400 |       |          | Sample size of 1000 |       |          |
|-----------------|----------|--------------------|-------|-----------------------|--------------------|-------|----------|---------------------|-------|----------|
|                 |          | Bias               | RMSE  | Coverage <sup>1</sup> | Bias               | RMSE  | Coverage | Bias                | RMSE  | Coverage |
| <b>Complete</b> |          | 0.001              | 0.088 | 96.0                  | 0.002              | 0.061 | 95.2     | 0.000               | 0.039 | 94.0     |
| 10%             | Deletion | 0.051              | 0.092 | 96.6                  | 0.053              | 0.074 | 96.5     | 0.053               | 0.061 | 96.2     |
|                 | DL/2     | -0.005             | 0.090 | 96.2                  | -0.005             | 0.064 | 95.7     | -0.004              | 0.042 | 93.3     |
|                 | ROS      | 0.015              | 0.081 | 96.0                  | 0.018              | 0.058 | 96.0     | 0.019               | 0.039 | 95.7     |
|                 | MI       | -0.015             | 0.096 | 94.3                  | -0.005             | 0.065 | 94.1     | 0.007               | 0.038 | 95.4     |
|                 | TOBIT    | -0.002             | 0.089 | 94.9                  | 0.002              | 0.063 | 95.6     | 0.000               | 0.040 | 94.8     |
| 30%             | Deletion | 0.085              | 0.112 | 96.1                  | 0.087              | 0.099 | 97.0     | 0.088               | 0.092 | 96.5     |
|                 | DL/2     | -0.008             | 0.099 | 95.1                  | -0.009             | 0.071 | 95.1     | -0.009              | 0.045 | 96.3     |
|                 | ROS      | 0.033              | 0.078 | 97.5                  | 0.031              | 0.058 | 96.7     | 0.033               | 0.044 | 96.7     |
|                 | MI       | -0.020             | 0.101 | 95.5                  | 0.000              | 0.063 | 96.0     | 0.021               | 0.040 | 95.4     |
|                 | TOBIT    | 0.001              | 0.095 | 94.3                  | -0.002             | 0.068 | 95.0     | 0.000               | 0.043 | 93.8     |
| 50%             | Deletion | 0.106              | 0.132 | 96.7                  | 0.105              | 0.117 | 97.1     | 0.108               | 0.112 | 96.6     |
|                 | DL/2     | 0.004              | 0.099 | 97.8                  | 0.000              | 0.070 | 97.4     | 0.002               | 0.044 | 97.2     |
|                 | ROS      | 0.040              | 0.077 | 96.9                  | 0.040              | 0.060 | 96.1     | 0.039               | 0.047 | 95.8     |
|                 | MI       | -0.014             | 0.097 | 97.2                  | 0.008              | 0.061 | 97.2     | 0.030               | 0.042 | 96.2     |
|                 | TOBIT    | -0.007             | 0.104 | 95.3                  | -0.003             | 0.073 | 95.7     | -0.004              | 0.047 | 95.8     |
| 70%             | Deletion | 0.122              | 0.156 | 96.5                  | 0.121              | 0.136 | 96.7     | 0.120               | 0.125 | 96.8     |
|                 | DL/2     | 0.035              | 0.095 | 97.9                  | 0.038              | 0.072 | 98.0     | 0.038               | 0.053 | 98.4     |
|                 | ROS      | 0.049              | 0.078 | 96.9                  | 0.047              | 0.063 | 96.2     | 0.047               | 0.053 | 96.7     |
|                 | MI       | 0.018              | 0.091 | 97.5                  | 0.027              | 0.061 | 96.2     | 0.038               | 0.046 | 95.5     |
|                 | TOBIT    | -0.011             | 0.129 | 93.9                  | -0.002             | 0.087 | 95.9     | -0.004              | 0.055 | 94.9     |

<sup>1</sup>probability of 95% CI
